# Supplementary material for: Decreased Levels of DNA Methylation in the PCDHA Gene Cluster as a Risk Factor for Early-Onset High Myopia in Young Children
Source: PubMed Central journal article supplement — Invest Ophthalmol Vis Sci. 2022 Aug 29;63(9):31. doi: 10.1167/iovs.63.9.31 (PMC9434983; doi:10.1167/iovs.63.9.31), 2022-08-29
Supplement: iovs-63-9-31_s001.pdf [file iovs-63-9-31_s001.pdf]

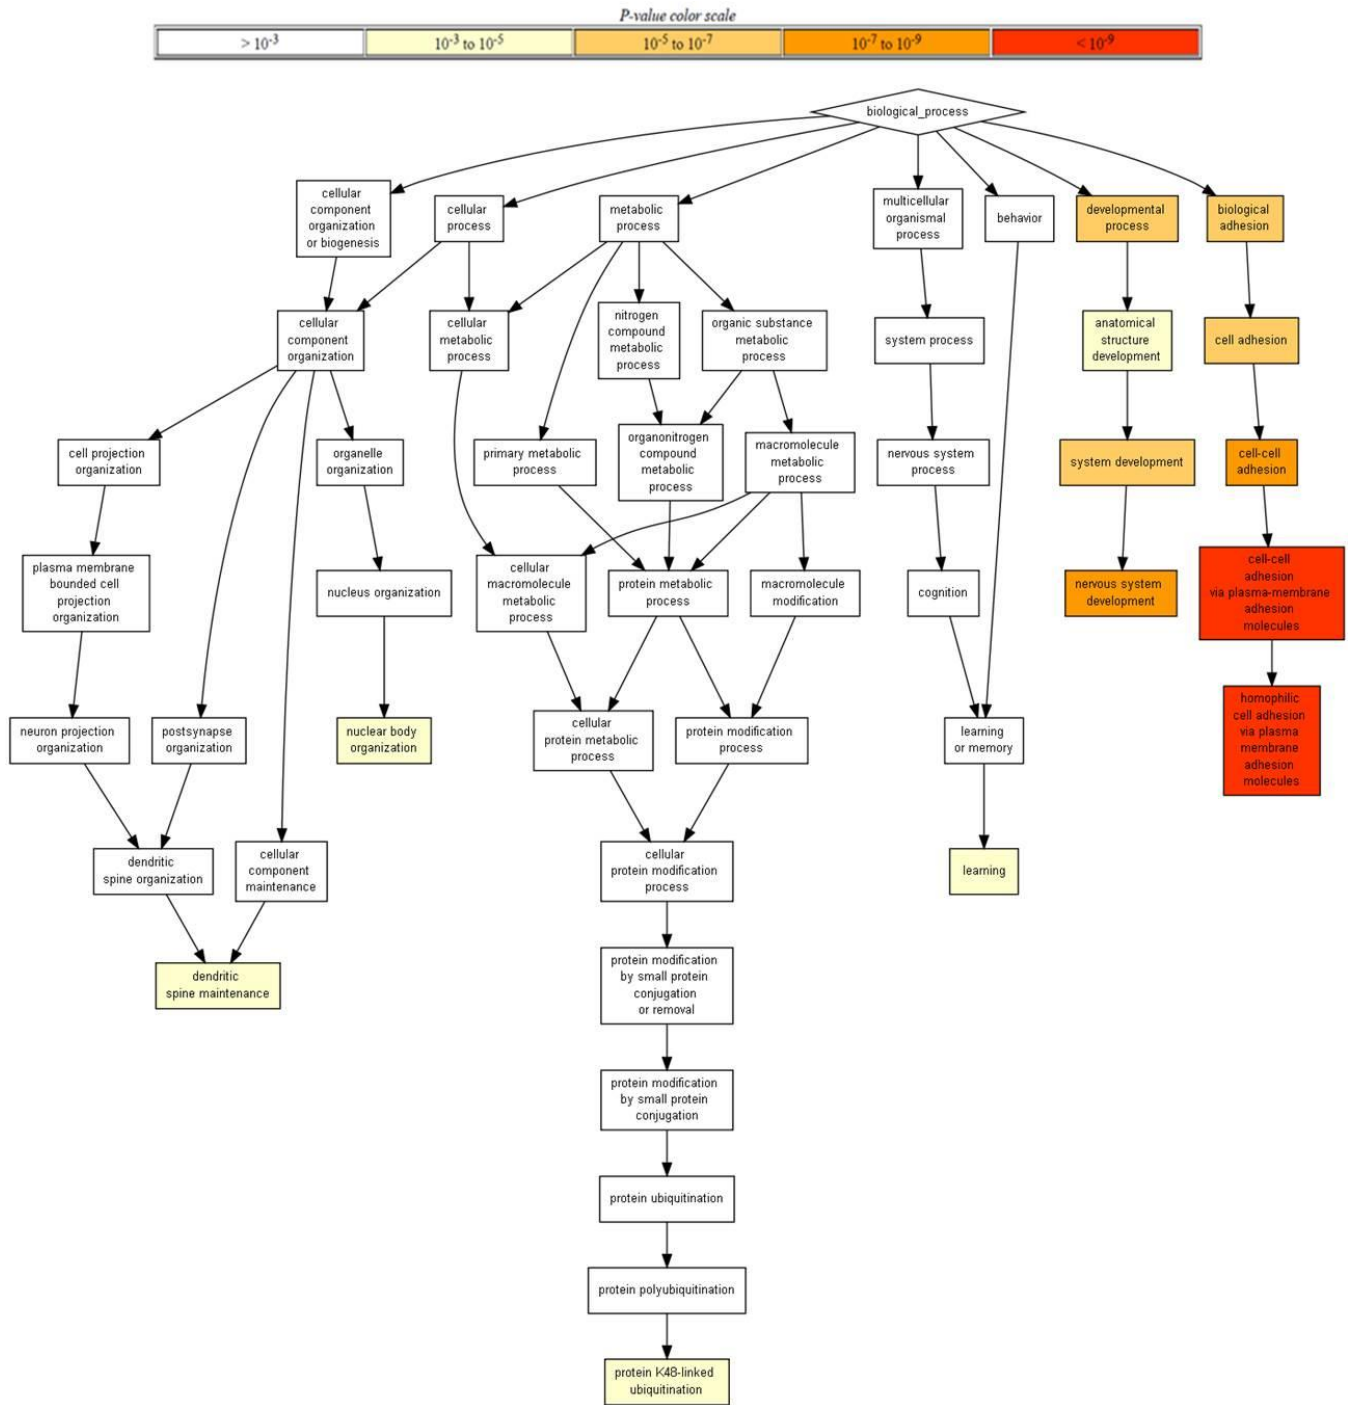

**Supplementary Figure S1. Overrepresented pathways/processes predicted in GOrilla enrichment analyses of genes with CG dinucleotides with at least 20% methylation difference**
