# Supplementary material for: Decreased Levels of DNA Methylation in the PCDHA Gene Cluster as a Risk Factor for Early-Onset High Myopia in Young Children
Source: PubMed Central journal article supplement — Invest Ophthalmol Vis Sci. 2022 Aug 29;63(9):31. doi: 10.1167/iovs.63.9.31 (PMC9434983; doi:10.1167/iovs.63.9.31), 2022-08-29
Supplement: iovs-63-9-31_s002.pdf [file iovs-63-9-31_s002.pdf]

**Supplementary Table S2. CG dinucleotides with at least 20% lower methylation level in HM cases when compared to controls, identified in gene sequence, including the promoter regions**

| Target ID  | Chromosome | Gene                                                                  | p-value                 | FDR p-value             | Methylation level in HM cases [%]* | Methylation level in controls [%]* | Difference in methylation level | Localization in gene |
|------------|------------|-----------------------------------------------------------------------|-------------------------|-------------------------|------------------------------------|------------------------------------|---------------------------------|----------------------|
| cg02054572 | 4          | <i>LINC01088</i>                                                      | 2.21 x10 <sup>-27</sup> | 1.88x10 <sup>-21</sup>  | 52.63                              | 81.71                              | <b>-29.08</b>                   | gene body            |
| cg17651890 | 8          | <i>RIMS2</i>                                                          | 1.02 x10 <sup>-27</sup> | 8.66 x10 <sup>-22</sup> | 46.07                              | 73.93                              | <b>-27.86</b>                   | gene body            |
| cg15349655 | 5          | <i>EPB41L4A</i>                                                       | 9.95 x10 <sup>-28</sup> | 8.46 x10 <sup>-22</sup> | 59.43                              | 86.62                              | <b>-27.20</b>                   | gene body            |
| cg27494055 | 5          | <i>PCDHA10</i>                                                        | 5.26 x10 <sup>-28</sup> | 4.47 x10 <sup>-22</sup> | 29.63                              | 56.70                              | <b>-27.07</b>                   | TSS1500              |
| cg27494055 | 5          | <i>PCDHA1;PCDHA2;PCDHA3;PCDHA4;PCDHA5;PCDHA6;PCDHA7;PCDHA8;PCDHA9</i> | 5.26 x10 <sup>-28</sup> | 4.47 x10 <sup>-22</sup> | 29.63                              | 56.70                              | <b>-27.07</b>                   | gene body            |
| cg10162971 | 2          | <i>GRHL1</i>                                                          | 5.19 x10 <sup>-28</sup> | 4.41 x10 <sup>-22</sup> | 46.25                              | 72.52                              | <b>-26.27</b>                   | gene body            |
| cg09701422 | 14         | <i>ADAM20</i>                                                         | 7.47 x10 <sup>-28</sup> | 6.35 x10 <sup>-22</sup> | 63.66                              | 89.87                              | <b>-26.21</b>                   | TSS1500              |
| cg13953630 | 4          | <i>OCIAD1</i>                                                         | 4.47 x10 <sup>-28</sup> | 3.80 x10 <sup>-22</sup> | 53.11                              | 78.94                              | <b>-25.84</b>                   | gene body            |
| cg19976037 | 17         | <i>CCDC57</i>                                                         | 3.30 x10 <sup>-28</sup> | 2.81 x10 <sup>-22</sup> | 46.81                              | 72.61                              | <b>-25.81</b>                   | gene body            |
| cg18093771 | 10         | <i>ADARB2</i>                                                         | 4.82 x10 <sup>-28</sup> | 4.10 x10 <sup>-22</sup> | 58.25                              | 84.01                              | <b>-25.76</b>                   | gene body            |
| cg26069044 | 11         | <i>NRGN</i>                                                           | 3.97 x10 <sup>-28</sup> | 3.37x10 <sup>-22</sup>  | 50.88                              | 76.55                              | <b>-25.67</b>                   | gene body            |
| cg26700469 | 16         | <i>WWOX</i>                                                           | 4.21 x10 <sup>-28</sup> | 3.58 x10 <sup>-22</sup> | 56.32                              | 81.91                              | <b>-25.59</b>                   | gene body            |
| cg25543264 | 7          | <i>COBL</i>                                                           | 3.57 x10 <sup>-28</sup> | 3.03 x10 <sup>-22</sup> | 37.02                              | 62.57                              | <b>-25.55</b>                   | gene body            |
| cg18731202 | 2          | <i>TGFA</i>                                                           | 2.21 x10 <sup>-28</sup> | 1.88 x10 <sup>-22</sup> | 47.55                              | 72.85                              | <b>-25.30</b>                   | gene body            |
| cg06281409 | 5          | <i>FBXO38</i>                                                         | 4.58 x10 <sup>-28</sup> | 3.89 x10 <sup>-22</sup> | 63.52                              | 88.79                              | <b>-25.27</b>                   | gene body            |
| cg15049439 | 19         | <i>INSR</i>                                                           | 2.94 x10 <sup>-28</sup> | 2.50 x10 <sup>-22</sup> | 54.21                              | 79.19                              | <b>-24.98</b>                   | gene body            |
| cg02766704 | 7          | <i>CTTNBP2</i>                                                        | 2.57 x10 <sup>-28</sup> | 2.19 x10 <sup>-22</sup> | 49.73                              | 74.50                              | <b>-24.77</b>                   | gene body            |
| cg25010006 | 8          | <i>PAG1</i>                                                           | 2.42 x10 <sup>-28</sup> | 2.06 x10 <sup>-22</sup> | 62.06                              | 86.48                              | <b>-24.43</b>                   | TSS1500              |
| cg14197110 | 4          | <i>CEP44</i>                                                          | 1.94 x10 <sup>-28</sup> | 1.65 x10 <sup>-22</sup> | 62.53                              | 86.39                              | <b>-23.87</b>                   | 3'UTR                |
| cg11603552 | 17         | <i>APOH</i>                                                           | 1.93 x10 <sup>-29</sup> | 1.64 x10 <sup>-23</sup> | 50.82                              | 74.53                              | <b>-23.71</b>                   | gene body            |
| cg24017056 | 15         | <i>ZFAND6</i>                                                         | 1.72 x10 <sup>-28</sup> | 1.46 x10 <sup>-22</sup> | 59.63                              | 83.28                              | <b>-23.64</b>                   | 5'UTR                |
| cg23836814 | 11         | <i>AGBL2</i>                                                          | 1.33 x10 <sup>-28</sup> | 1.13 x10 <sup>-22</sup> | 44.55                              | 68.16                              | <b>-23.61</b>                   | 3'UTR                |
| cg02137496 | 11         | <i>DLG2</i>                                                           | 1.30 x10 <sup>-28</sup> | 1.10 x10 <sup>-22</sup> | 61.18                              | 84.41                              | <b>-23.23</b>                   | gene body            |
| cg13432799 | 5          | <i>SNX2</i>                                                           | 1.69 x10 <sup>-28</sup> | 1.43 x10 <sup>-22</sup> | 66.44                              | 89.65                              | <b>-23.21</b>                   | gene body            |
| cg07736012 | 3          | <i>MED12L</i>                                                         | 1.27 x10 <sup>-28</sup> | 1.08 x10 <sup>-22</sup> | 68.25                              | 91.16                              | <b>-22.91</b>                   | gene body            |
| cg09925682 | 19         | <i>NFIC</i>                                                           | 3.07 x10 <sup>-29</sup> | 2.61 x10 <sup>-23</sup> | 56.15                              | 79.06                              | <b>-22.91</b>                   | gene body            |
| cg08913233 | 10         | <i>VTIA</i>                                                           | 1.10 x10 <sup>-28</sup> | 9.32 x10 <sup>-23</sup> | 68.06                              | 90.83                              | <b>-22.77</b>                   | gene body            |

|                   |    |                  |                         |                         |       |       |               |           |
|-------------------|----|------------------|-------------------------|-------------------------|-------|-------|---------------|-----------|
| <b>cg27078890</b> | 11 | <i>ETS1</i>      | 1.06 x10 <sup>-28</sup> | 9.04 x10 <sup>-23</sup> | 65.25 | 88.02 | <b>-22.76</b> | TSS200    |
| <b>cg10025778</b> | 7  | <i>CCDC146</i>   | 9.61 x10 <sup>-29</sup> | 8.16 x10 <sup>-23</sup> | 63.16 | 85.79 | <b>-22.63</b> | gene body |
| <b>cg15039162</b> | 13 | <i>ABHD13</i>    | 9.49 x10 <sup>-29</sup> | 8.07 x10 <sup>-23</sup> | 62.27 | 84.72 | <b>-22.46</b> | 5'UTR     |
| <b>cg15039162</b> | 13 | <i>LIG4</i>      | 9.49 x10 <sup>-29</sup> | 8.07 x10 <sup>-23</sup> | 62.27 | 84.72 | <b>-22.46</b> | TSS1500   |
| <b>cg21610839</b> | 3  | <i>UBE2E1</i>    | 6.90 x10 <sup>-29</sup> | 5.87 x10 <sup>-23</sup> | 42.87 | 65.24 | <b>-22.37</b> | gene body |
| <b>cg19518093</b> | 8  | <i>SBSPON</i>    | 8.99 x10 <sup>-29</sup> | 7.64 x10 <sup>-23</sup> | 67.98 | 90.18 | <b>-22.20</b> | TSS1500   |
| <b>cg21494160</b> | 18 | <i>PTPRM</i>     | 7.78 x10 <sup>-29</sup> | 6.61 x10 <sup>-23</sup> | 66.49 | 88.70 | <b>-22.20</b> | gene body |
| <b>cg27374674</b> | 17 | <i>GAS7</i>      | 6.84 x10 <sup>-29</sup> | 5.82 x10 <sup>-23</sup> | 56.08 | 78.23 | <b>-22.16</b> | gene body |
| <b>cg27262015</b> | 4  | <i>SORBS2</i>    | 6.53 x10 <sup>-29</sup> | 5.55 x10 <sup>-23</sup> | 64.35 | 86.16 | <b>-21.82</b> | TSS200    |
| <b>cg25885356</b> | 21 | <i>RUNX1</i>     | 4.47 x10 <sup>-29</sup> | 3.80 x10 <sup>-23</sup> | 51.60 | 73.15 | <b>-21.55</b> | gene body |
| <b>cg00571519</b> | 7  | <i>SRPK2</i>     | 3.65 x10 <sup>-29</sup> | 3.11 x10 <sup>-23</sup> | 63.58 | 85.11 | <b>-21.52</b> | gene body |
| <b>cg21047322</b> | 6  | <i>AKAP12</i>    | 3.86 x10 <sup>-29</sup> | 3.28 x10 <sup>-23</sup> | 48.67 | 70.16 | <b>-21.49</b> | gene body |
| <b>cg24562221</b> | 1  | <i>CACYBP</i>    | 4.78 x10 <sup>-29</sup> | 4.06 x10 <sup>-23</sup> | 59.35 | 80.79 | <b>-21.44</b> | gene body |
| <b>cg11683966</b> | 1  | <i>SLC25A3P1</i> | 4.41 x10 <sup>-29</sup> | 3.75 x10 <sup>-23</sup> | 49.46 | 70.84 | <b>-21.38</b> | TSS200    |
| <b>cg18556587</b> | 2  | <i>TANC1</i>     | 4.05 x10 <sup>-29</sup> | 3.44 x10 <sup>-23</sup> | 53.42 | 74.74 | <b>-21.32</b> | 5'UTR     |
| <b>cg12836825</b> | 3  | <i>LMOD3</i>     | 4.92 x10 <sup>-29</sup> | 4.18 x10 <sup>-23</sup> | 66.22 | 87.39 | <b>-21.16</b> | TSS1500   |
| <b>cg26393261</b> | 6  | <i>ATXN1</i>     | 3.82 x10 <sup>-29</sup> | 3.24 x10 <sup>-23</sup> | 43.33 | 64.38 | <b>-21.05</b> | 5'UTR     |
| <b>cg15144397</b> | 3  | <i>SPATA16</i>   | 3.76 x10 <sup>-29</sup> | 3.20 x10 <sup>-23</sup> | 59.88 | 80.86 | <b>-20.98</b> | gene body |
| <b>cg15357273</b> | 3  | <i>CCDC50</i>    | 4.73 x10 <sup>-29</sup> | 4.02 x10 <sup>-23</sup> | 63.24 | 84.19 | <b>-20.95</b> | gene body |
| <b>cg14540736</b> | 18 | <i>ZNF516</i>    | 2.71 x10 <sup>-29</sup> | 2.31 x10 <sup>-23</sup> | 50.55 | 71.30 | <b>-20.75</b> | gene body |
| <b>cg19032370</b> | 1  | <i>EVI5</i>      | 3.05 x10 <sup>-29</sup> | 2.59 x10 <sup>-23</sup> | 64.94 | 85.40 | <b>-20.47</b> | gene body |
| <b>cg11755269</b> | 21 | <i>CRYZL1</i>    | 3.74 x10 <sup>-29</sup> | 3.18 x10 <sup>-23</sup> | 65.43 | 85.88 | <b>-20.46</b> | gene body |
| <b>cg24684709</b> | 2  | <i>FARP2</i>     | 7.03x10 <sup>-25</sup>  | 5.97 x10 <sup>-19</sup> | 45.02 | 65.44 | <b>-20.42</b> | 5'UTR     |
| <b>cg07418777</b> | 10 | <i>CCDC3</i>     | 2.61 x10 <sup>-29</sup> | 2.22 x10 <sup>-23</sup> | 54.30 | 74.70 | <b>-20.40</b> | gene body |
| <b>cg21537492</b> | 8  | <i>SNTB1</i>     | 3.00 x10 <sup>-29</sup> | 2.55 x10 <sup>-23</sup> | 70.86 | 91.17 | <b>-20.31</b> | gene body |
| <b>cg21685655</b> | 7  | <i>PON2</i>      | 3.14 x10 <sup>-29</sup> | 2.67 x10 <sup>-23</sup> | 69.00 | 89.30 | <b>-20.29</b> | 3'UTR     |
| <b>cg05939089</b> | 14 | <i>ARMH4</i>     | 2.32 x10 <sup>-29</sup> | 1.98 x10 <sup>-23</sup> | 55.25 | 75.45 | <b>-20.20</b> | gene body |
| <b>cg05740739</b> | 2  | <i>OR6B3</i>     | 2.25 x10 <sup>-29</sup> | 1.92 x10 <sup>-23</sup> | 55.98 | 76.12 | <b>-20.14</b> | TSS1500   |
| <b>cg17721001</b> | 8  | <i>UBR5</i>      | 2.14 x10 <sup>-29</sup> | 1.82 x10 <sup>-23</sup> | 54.75 | 74.78 | <b>-20.03</b> | gene body |

FDR - false discovery rate, HM - high myopia, TSS200 - 0-200 bases upstream of the transcriptional start site, TSS1500 - 200-1500 bases upstream of the transcriptional start site

\* Methylation levels in children are presented as mean values

**Supplementary Table S3. Additional information about genes overlapping the highest-ranked differentially methylated CG dinucleotides located in promoter regions with at least 20% decrease in the methylation level when compare HM cases to controls**

| Gene                                                      | OMIM accession number | Coding protein                             | Locus   | Nearby myopia locus  | Gene function (GeneCards*, NCBI Gene database†)                                                                                                                                                                                                                                                                                                                            | Eye related phenotypes/myopia risk factors (GWAS Catalog‡)                                                                                                                                   | Mouse ocular phenotype (Mouse Genome Informatics§)                                                                        |
|-----------------------------------------------------------|-----------------------|--------------------------------------------|---------|----------------------|----------------------------------------------------------------------------------------------------------------------------------------------------------------------------------------------------------------------------------------------------------------------------------------------------------------------------------------------------------------------------|----------------------------------------------------------------------------------------------------------------------------------------------------------------------------------------------|---------------------------------------------------------------------------------------------------------------------------|
| <b>Genes related to myopia, eye structure or function</b> |                       |                                            |         |                      |                                                                                                                                                                                                                                                                                                                                                                            |                                                                                                                                                                                              |                                                                                                                           |
| <i>PCDHA10</i>                                            | 606316                | protocadherin alpha 10                     | 5q31.3  | MYP25: 5q31          | Encoded neural cadherin-like cell adhesion protein is most likely involved in the establishment and maintenance of specific neuronal connections in the brain.                                                                                                                                                                                                             | Refractive error (Europeans, GCST010002)                                                                                                                                                     | nd                                                                                                                        |
| <i>ADAM20</i>                                             | 603712                | ADAM metalloproteinase domain 20           | 14q24.2 | MYP18: 14q22.1-q24.2 | Encode membrane-anchored protein structurally related to snake venom disintegrins, and have been implicated in a variety of biological processes involving cell-cell and cell-matrix interactions, including fertilization, muscle development, and neurogenesis. May be involved in sperm maturation and/or fertilization.                                                | nd                                                                                                                                                                                           | nd                                                                                                                        |
| <i>ZFAND6</i>                                             | 610183                | zinc finger AN1-type containing 6          | 15q25.1 |                      | Involved in regulation of TNF-alpha induced NF-kappa-B activation and apoptosis. Required for PTS1 target sequence-dependent protein import into peroxisomes and PEX5 stability; may cooperate with PEX6. In vitro involved in PEX5 export from the cytosol to peroxisomes                                                                                                 | nd                                                                                                                                                                                           | expressed in mouse whole eye, retina and neural retina (MGI:1929510)                                                      |
| <i>ETS1</i>                                               | 164720                | ETS proto-oncogene 1, transcription factor | 11q24.3 |                      | The protein is a transcription factor that directly controls the expression of cytokine and chemokine genes in a wide variety of different cellular contexts. May control the differentiation, survival and proliferation of lymphoid cells. May also regulate angiogenesis through regulation of expression of genes controlling endothelial cell migration and invasion. | Intraocular pressure (Europeans, GCST006394, GCST009725, GCST006412, GCST005580, GCST010376), glaucoma (Europeans, GCST006395, GCST009726, GCST009722, GCST90011770, GCST011439, GCST011438) | low expression in mouse whole eye, retina and neural retina (MGI:95455)                                                   |
| <i>ABHD13</i>                                             | -                     | abhydrolase domain containing 13           | 13q33.3 |                      | nd                                                                                                                                                                                                                                                                                                                                                                         | nd                                                                                                                                                                                           | expressed in mouse whole eye, retina and neural retina, mutation in this gene cause abnormal eye morphology (MGI:1916154) |

|                                                                                |        |                                                           |         |               |                                                                                                                                                                                                                                                                                                                                                                                                                        |                                                                                                                                                           |                                                                                                                                                                                               |
|--------------------------------------------------------------------------------|--------|-----------------------------------------------------------|---------|---------------|------------------------------------------------------------------------------------------------------------------------------------------------------------------------------------------------------------------------------------------------------------------------------------------------------------------------------------------------------------------------------------------------------------------------|-----------------------------------------------------------------------------------------------------------------------------------------------------------|-----------------------------------------------------------------------------------------------------------------------------------------------------------------------------------------------|
| <i>SBSPO</i>                                                                   | -      | somatomedin B and thrombospondin type 1 domain containing | 8q21.11 |               | nd                                                                                                                                                                                                                                                                                                                                                                                                                     | Corneal curvature/corneal topography (Australians, GCST001680)                                                                                            | low expression in mouse whole eye, retina and neural retina (MGI:2684952)                                                                                                                     |
| <i>SORBS2</i>                                                                  | 616349 | sorbin and SH3 domain containing 2                        | 4q35.1  | MYP22: 4q35   | Adapter protein that plays a role in the assembling of signaling complexes, being a link between ABL kinases and actin cytoskeleton. Can form complex with ABL1 and CBL, thus promoting ubiquitination and degradation of ABL1. May play a role in the regulation of pancreatic cell adhesion, possibly by acting on WASF1 phosphorylation, enhancing phosphorylation by ABL1, as well as dephosphorylation by PTPN12. | Iris color/eye color measurement (South Asians, GCST007740 ), Educational attainment (years of education) (Europeans, GCST006442, GCST006571)             | expressed in mouse whole eye, retina and neural retina, mutation in this gene cause abnormal retina morphology (MGI:1924574)                                                                  |
| <i>LMOD3</i>                                                                   | 616112 | leiomodin 3                                               | 3p14.1  |               | Essential for the organization of sarcomeric actin thin filaments in skeletal muscle. Increases the rate of actin polymerization.                                                                                                                                                                                                                                                                                      | nd                                                                                                                                                        | expressed in eye skeletal muscle and retina in mouse embryo, low expression in eye of adult mouse (not detected in retina), mutation in this gene cause abnormal eye morphology (MGI:2444169) |
| <i>ATXN1</i>                                                                   | 601556 | ataxin 1                                                  | 6p22.3  |               | Chromatin-binding factor that repress Notch signaling in the absence of Notch intracellular domain by acting as a CBF1 corepressor. Binds to the HEY promoter and might assist, along with NCOR2, RBPJ-mediated repression. Binds RNA in vitro. May be involved in RNA metabolism. In concert with CIC and ATXN1L, involved in brain development.                                                                      | Central corneal thickness (multiethnic cohort, GCST90000654), educational attainment (years of education) (Europeans, GCST003676, GCST006442, GCST006571) | expressed in mouse whole eye, retina and neural retina (MGI:104783)                                                                                                                           |
| <i>FARP2</i>                                                                   | 617586 | FERM, ARH/RhoGEF and pleckstrin domain protein 2          | 2q37.3  | MYP12: 2q37.1 | Functions as guanine nucleotide exchange factor that activates RAC1. Plays a role in the response to class 3 semaphorins and remodeling of the actin cytoskeleton. Plays a role in TNFSF11-mediated osteoclast differentiation, especially in podosome rearrangement and reorganization of the actin cytoskeleton. Regulates the activation of ITGB3, integrin signaling and cell adhesion.                            | Educational attainment (years of education) (Europeans, GCST006442, GCST006571)                                                                           | expressed in mouse whole eye, retina and neural retina (MGI:2385126)                                                                                                                          |
| <b>Genes expressed in the eye but with unknown association with myopia/eye</b> |        |                                                           |         |               |                                                                                                                                                                                                                                                                                                                                                                                                                        |                                                                                                                                                           |                                                                                                                                                                                               |
| <i>PAG1</i>                                                                    | 605767 | phosphoprotein membrane anchor with                       | 8q21.13 |               | Negatively regulates T-cell antigen receptor-mediated signaling in T-cells and FCER1-mediated signaling in mast cells. Inhibits immunological synapse formation by preventing                                                                                                                                                                                                                                          | nd                                                                                                                                                        | expressed in mouse whole eye, retina and neural retina                                                                                                                                        |

|                                                                         |        |                                                                       |         |               |                                                                                                                                                                                                                                                                                                                                                        |                                                                |                                                                      |
|-------------------------------------------------------------------------|--------|-----------------------------------------------------------------------|---------|---------------|--------------------------------------------------------------------------------------------------------------------------------------------------------------------------------------------------------------------------------------------------------------------------------------------------------------------------------------------------------|----------------------------------------------------------------|----------------------------------------------------------------------|
|                                                                         |        | glycosphingolipid microdomains 1                                      |         |               | dynamic arrangement of lipid raft proteins. May be involved in cell adhesion signaling.                                                                                                                                                                                                                                                                |                                                                | (MGI:2443160)                                                        |
| <i>LIG4</i>                                                             | 601837 | DNA ligase 4                                                          | 13q33.3 |               |                                                                                                                                                                                                                                                                                                                                                        |                                                                | expressed in mouse whole eye, retina and neural retina (MGI:1929510) |
| <i>TANC1</i>                                                            | 611397 | tetratricopeptide repeat, ankyrin repeat and coiled-coil containing 1 | 2q24.2  |               | May be a scaffold component in the postsynaptic density.                                                                                                                                                                                                                                                                                               | nd                                                             | expressed in mouse whole eye, retina and neural retina (MGI:1914110) |
| <b>Genes not expressed in the eye or not associated with myopia/eye</b> |        |                                                                       |         |               |                                                                                                                                                                                                                                                                                                                                                        |                                                                |                                                                      |
| <i>SLC25A3P1</i>                                                        | -      | solute carrier family 25 member 3 pseudogene 1                        | 1p32.3  |               |                                                                                                                                                                                                                                                                                                                                                        | nd                                                             | nd                                                                   |
| <i>OR6B3</i>                                                            | -      | olfactory receptor family 6 subfamily B member 3                      | 2q37.3  | MYP12: 2q37.1 | Olfactory receptor interact with odorant molecules in the nose, to initiate a neuronal response that triggers the perception of a smell. Olfactory receptors share a 7-transmembrane domain structure with many neurotransmitter and hormone receptors and are responsible for the recognition and G protein-mediated transduction of odorant signals. | DNA methylation variation (age effect) (Europeans, GCST006660) | nd                                                                   |

nd – no data

\*GeneCards (<https://www.genecards.org/>)

†National Center for Biotechnology Information (NCBI), Gene database (<https://www.ncbi.nlm.nih.gov/>)

‡GWAS Catalog (<https://www.ebi.ac.uk/gwas/>)

§Mouse Genome Informatics (MGI, <http://www.informatics.jax.org/>)

**Supplementary Table S4. Expression of genes overlapping the highest-ranked CG dinucleotides with at least 20% decreased methylation level in promoter region, based on data of the ARPE-19 cell line [35]**

Expression in the cell line is presented as transcripts per million reads (TPM) after four days and after four months of culture

| Gene             | 4 days culture [TPM] |        |       |       | 4 months culture [TPM] |       |       |       |
|------------------|----------------------|--------|-------|-------|------------------------|-------|-------|-------|
|                  | 1 rep                | 2 rep  | 3 rep | Mean  | 1 rep                  | 2 rep | 3 rep | Mean  |
| <i>ZFAND6</i>    | 93.09                | 102.79 | 98.71 | 98.20 | 82.47                  | 92.81 | 94.45 | 89.91 |
| <i>ETS1</i>      | 37.18                | 42.46  | 41.09 | 40.24 | 16.63                  | 15.09 | 17.61 | 16.44 |
| <i>TANCI</i>     | 20.59                | 22.35  | 23.37 | 22.10 | 42.46                  | 39.44 | 45.35 | 42.42 |
| <i>ABHD13</i>    | 14.41                | 16.37  | 15.32 | 15.37 | 23.2                   | 22.33 | 24.16 | 23.23 |
| <i>LIG4</i>      | 9.62                 | 11.57  | 10.7  | 10.63 | 9.92                   | 10.26 | 10.54 | 10.24 |
| <i>FARP2</i>     | 5.96                 | 6.97   | 7.49  | 6.81  | 7.18                   | 6.39  | 7.13  | 6.90  |
| <i>PAG1</i>      | 5.55                 | 6.75   | 6.43  | 6.24  | 13.76                  | 15.62 | 15.77 | 15.05 |
| <i>SBSPON</i>    | 5.36                 | 5.95   | 5.85  | 5.72  | 6.11                   | 7.06  | 6.65  | 6.61  |
| <i>ATXN1</i>     | 4.76                 | 5.81   | 4.78  | 5.12  | 10.76                  | 9.62  | 10.46 | 10.28 |
| <i>SORBS2</i>    | 0.63                 | 0.48   | 0.76  | 0.62  | 9.16                   | 9     | 9.76  | 9.31  |
| <i>LMOD3</i>     | 0.2                  | 0.33   | 0.21  | 0.25  | 0.31                   | 0.26  | 0.35  | 0.31  |
| <i>PCDHA10</i>   | 0.17                 | 0.17   | 0.31  | 0.22  | 0.13                   | 0.24  | 0.20  | 0.19  |
| <i>ADAM20</i>    | 0.25                 | 0.14   | 0.16  | 0.18  | 0.35                   | 0.3   | 0.32  | 0.32  |
| <i>SLC25A3P1</i> | 0                    | 0      | 0     | 0     | 0                      | 0     | 0     | 0     |
| <i>OR6B3</i>     | 0                    | 0      | 0     | 0     | 0                      | 0     | 0     | 0     |

nd - no data

**Supplementary Table S5. Results of Sanger sequencing of SNVs rs1581364290, rs200661444 and rs246073 located in *PCDHA10*, including its promoter region, in children with HM and children without HM**

| Children with HM |                     |                    |                 | Children without HM |                     |                    |                 |
|------------------|---------------------|--------------------|-----------------|---------------------|---------------------|--------------------|-----------------|
| Sample number    | rs1581364290<br>C>T | rs200661444<br>C>T | rs246073<br>T>C | Sample number       | rs1581364290<br>C>T | rs200661444<br>C>T | rs246073<br>T>C |
| UR-809           | CC                  | CC                 | TC              | UR-837              | CC                  | CC                 | TC              |
| UR-810           | CC                  | CC                 | TT              | UR-838              | CC                  | CC                 | TC              |
| UR-813           | CC                  | CC                 | TC              | UR-839              | CC                  | CC                 | TC              |
| UR-814           | CC                  | CC                 | TC              | UR-840              | CC                  | CC                 | TC              |
| UR-816           | CC                  | CC                 | TT              | UR-842              | CC                  | CC                 | TC              |
| UR-817           | CC                  | CC                 | TC              | UR-843              | CC                  | CC                 | TC              |
| UR-818           | CC                  | CC                 | TC              | UR-844              | CC                  | CC                 | CC              |
| UR-819           | CC                  | CC                 | TT              | UR-845              | CC                  | CC                 | CC              |
| UR-821           | CC                  | CC                 | TT              | UR-846              | CC                  | CC                 | TC              |
| UR-822           | CC                  | CC                 | TT              | UR-847              | CC                  | CC                 | TC              |
| UR-823           | CC                  | CC                 | TT              | UR-848              | CC                  | CC                 | TT              |
| UR-824           | CC                  | CC                 | CC              | UR-849              | CC                  | CC                 | TC              |
| UR-825           | CC                  | CC                 | TT              | UR-850              | CC                  | CC                 | CC              |
| UR-826           | CC                  | CC                 | TT              | UR-851              | CC                  | CC                 | TT              |
| UR-827           | CC                  | CC                 | TC              | UR-852              | CC                  | CC                 | TC              |
| UR-829           | CC                  | CC                 | TT              | UR-853              | CC                  | CC                 | CC              |
| UR-831           | CC                  | CC                 | TC              | UR-854              | CC                  | CC                 | TC              |
| UR-832           | CC                  | CC                 | TC              | UR-855              | CC                  | CC                 | TT              |



**Supplementary Table S6. Significantly overrepresented biological processes (q-value<0.01) predicted by GO and GOrilla enrichment analyses of genes with CG dinucleotides with at least 20% methylation difference**

| <b>Biological process</b>                                       | <b>p-value</b>         | <b>q-value</b>        | <b>Genes</b>                                                                                                                                                                                                                                          |
|-----------------------------------------------------------------|------------------------|-----------------------|-------------------------------------------------------------------------------------------------------------------------------------------------------------------------------------------------------------------------------------------------------|
| Homophilic cell adhesion via plasma membrane adhesion molecules | 4.01x10 <sup>-12</sup> | 6.22x10 <sup>-8</sup> | <i>PCDHA10, PCDHA9, PCDHA8, PCDHA7, PCDHA6, PCDHA5, PCDHA4, PCDHA3, PCDHA2, PCDHA1, PTPRM</i>                                                                                                                                                         |
| Cell-cell adhesion via plasma-membrane adhesion molecules       | 4.1x10 <sup>-10</sup>  | 3.18x10 <sup>-6</sup> | <i>PCDHA10, PCDHA9, PCDHA8, PCDHA7, PCDHA6, PCDHA5, PCDHA4, PCDHA3, PCDHA2, PCDHA1, PTPRM</i>                                                                                                                                                         |
| Nervous system development                                      | 4.91x10 <sup>-9</sup>  | 2.54x10 <sup>-5</sup> | <i>PCDHA10, PCDHA8, PCDHA7, PCDHA6, PCDHA5, PCDHA4, PCDHA3, PCDHA2, PCDHA1, ATXN1, NRGN</i>                                                                                                                                                           |
| Cell-cell adhesion                                              | 5.23x10 <sup>-8</sup>  | 2.03x10 <sup>-4</sup> | <i>PCDHA10, PCDHA9, PCDHA8, PCDHA7, PCDHA6, PCDHA5, PCDHA4, PCDHA3, PCDHA2, PCDHA1, DLG2, PTPRM</i>                                                                                                                                                   |
| Developmental process                                           | 1.39x10 <sup>-6</sup>  | 4.3x10 <sup>-3</sup>  | <i>PCDHA10, PCDHA8, PCDHA7, PCDHA6, PCDHA5, PCDHA4, PCDHA3, PCDHA2, PCDHA1, ZNF516, CACYBP, SPATA16, DLG2, LIG4, ATXN1, PTPRM, RIMS2, FARP2, ETS1, LMOD3, ADAM20, COBL, CTTNBP2, SORBS2, SRPK2, INSR, GRHL1, TANC1, RUNX1, NRGN, SNX2, WWOX, GAS7</i> |
| System development                                              | 1.87x10 <sup>-6</sup>  | 4.83x10 <sup>-3</sup> | <i>PCDHA10, PCDHA8, PCDHA7, PCDHA6, PCDHA5, PCDHA4, PCDHA3, PCDHA2, PCDHA1, LIG4, ATXN1, NRGN</i>                                                                                                                                                     |
| Cell adhesion                                                   | 4.58x10 <sup>-6</sup>  | 1.01x10 <sup>-2</sup> | <i>PCDHA10, PCDHA9, PCDHA8, PCDHA7, PCDHA6, PCDHA5, PCDHA4, PCDHA3, PCDHA2, PCDHA1, DLG2, PTPRM, FARP2</i>                                                                                                                                            |
| Biological adhesion                                             | 4.91x10 <sup>-6</sup>  | 9.53x10 <sup>-3</sup> | <i>PCDHA10, PCDHA9, PCDHA8, PCDHA7, PCDHA6, PCDHA5, PCDHA4, PCDHA3, PCDHA2, PCDHA1, DLG2, PTPRM, FARP2</i>                                                                                                                                            |
